# Supplementary material for: Theoretical investigation of armchair silicene nanoribbons with application in stretchable electronics
Source: Royal Society of Chemistry journal article supplement (doi:10.1039/c5tc00792e), 2015-01-01
Supplement: c5tc00792e1.pdf [file c5tc00792e1.pdf]

## Electronic supplementary information

# Theoretical investigation on armchair silicene nanoribbons with application in stretchable electronics

Tengying Ma<sup>a</sup>, Shizheng Wen<sup>b</sup>, Caixia Wu<sup>a</sup>, Likai Yan<sup>\*a</sup>, Min Zhang<sup>\*a</sup>, Yuhe Kan<sup>b</sup> and Zhongmin Su<sup>\*a</sup>

<sup>a</sup> *Institute of Functional Material Chemistry, Faculty of Chemistry, Northeast Normal University, Changchun 130024, P. R. China. E-mail: yanlk924@nenu.edu.cn; mzhang@nenu.edu.cn; zmsu@nenu.edu.cn*

<sup>b</sup> *Jiangsu Province Key Laboratory for Chemistry of Low-Dimensional Materials, School of Chemistry and Chemical Engineering, Huaiyin Normal University, Huaian, 223300, People's Republic of China*

E-mail: yanlk924@nenu.edu.cn; mzhang@nenu.edu.cn; zmsu@nenu.edu.cn

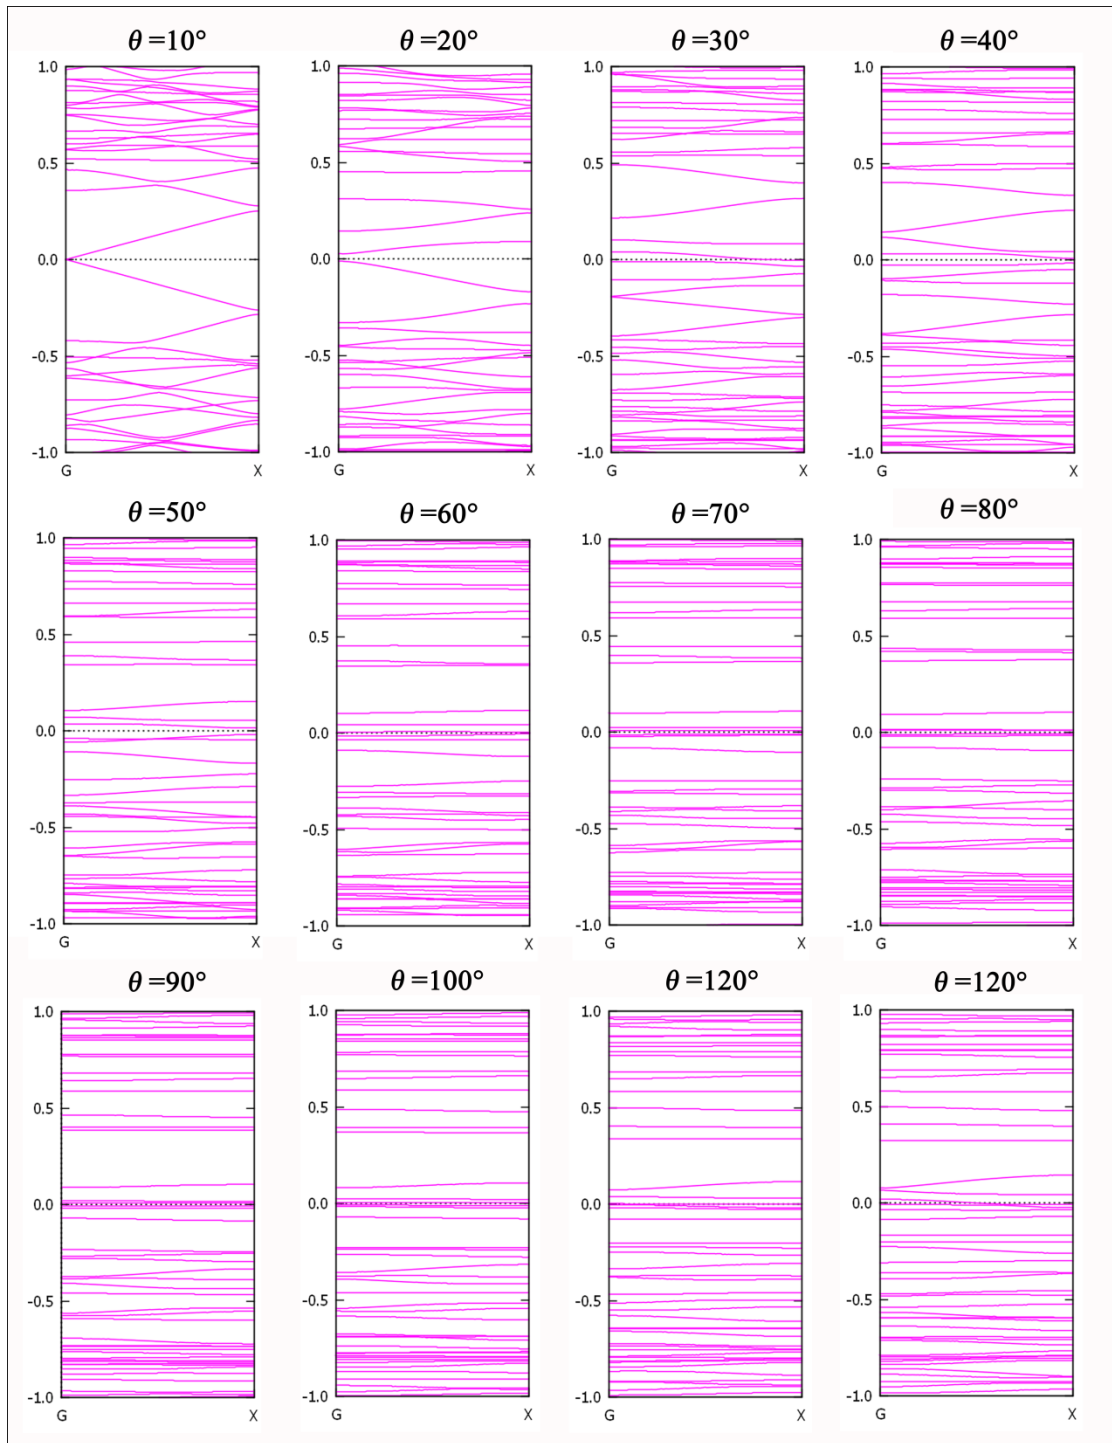

Fig. S1 The band structures of deformed SiNRs for  $\theta = 10^\circ \sim 120^\circ$ .
